# Supplementary material for: Recyclable Shape-Memory Waterborne Polyurethane Films Based on Perylene Bisimide Modified Polycaprolactone Diol
Source: MDPI journal article supplement (doi:10.3390/polym13111755), 2021-05-27
Supplement: s1 [file s1]

Archive with 5 entries (5 files):
- Movie S1.mp4
- Movie S2.mp4
- Movie S3.mp4
- Movie S4.mp4
- Supporting Information.pdf
